# Supplementary figures and images for: Masticatory (`superfast') myosin heavy chain and embryonic/atrial myosin light chain 1 in rodent jaw-closing muscles
Source: Oxford University Press journal article supplement (doi:10.1242/jeb.031369), 2009-07-31

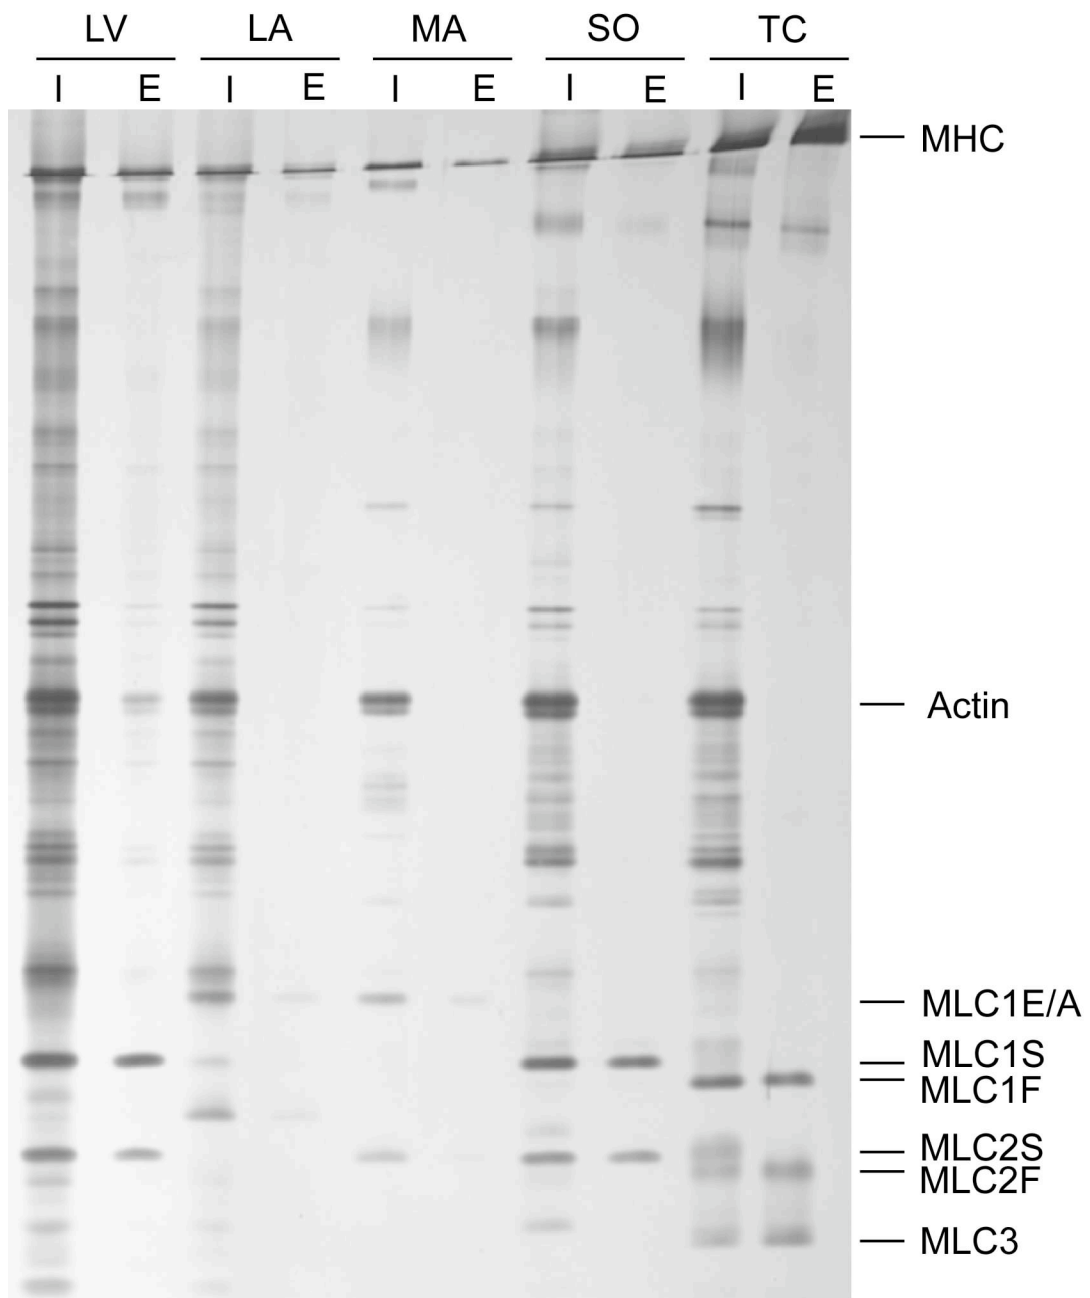

Supplement: jeb031369-figs2.pdf [file jeb031369-figs2.pdf]

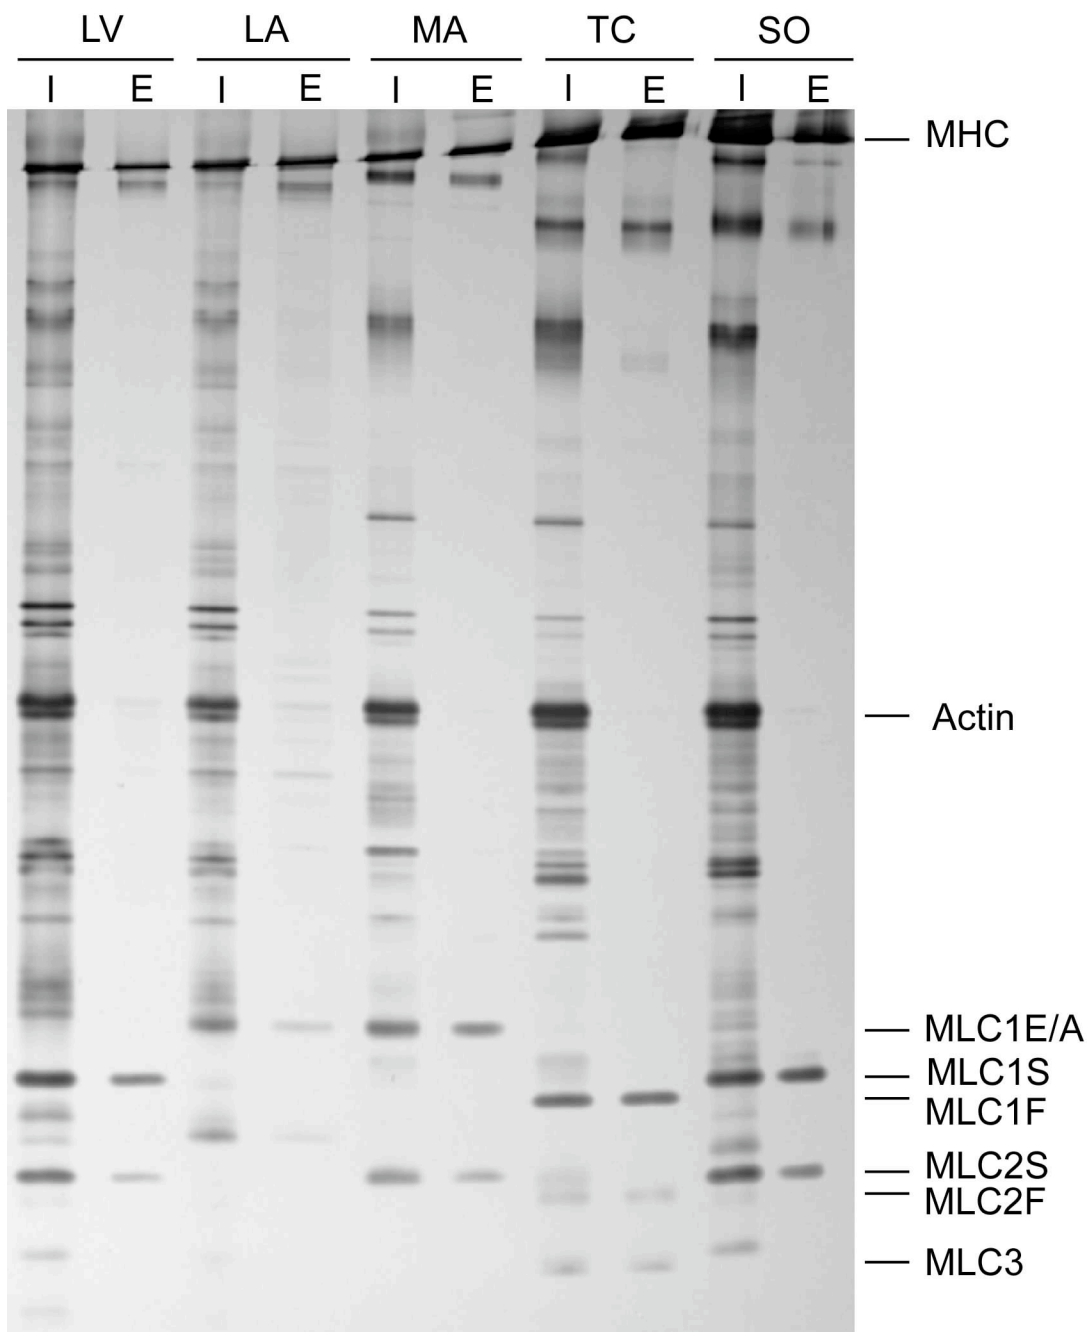

Supplement: jeb031369-figs3.pdf [file jeb031369-figs3.pdf]

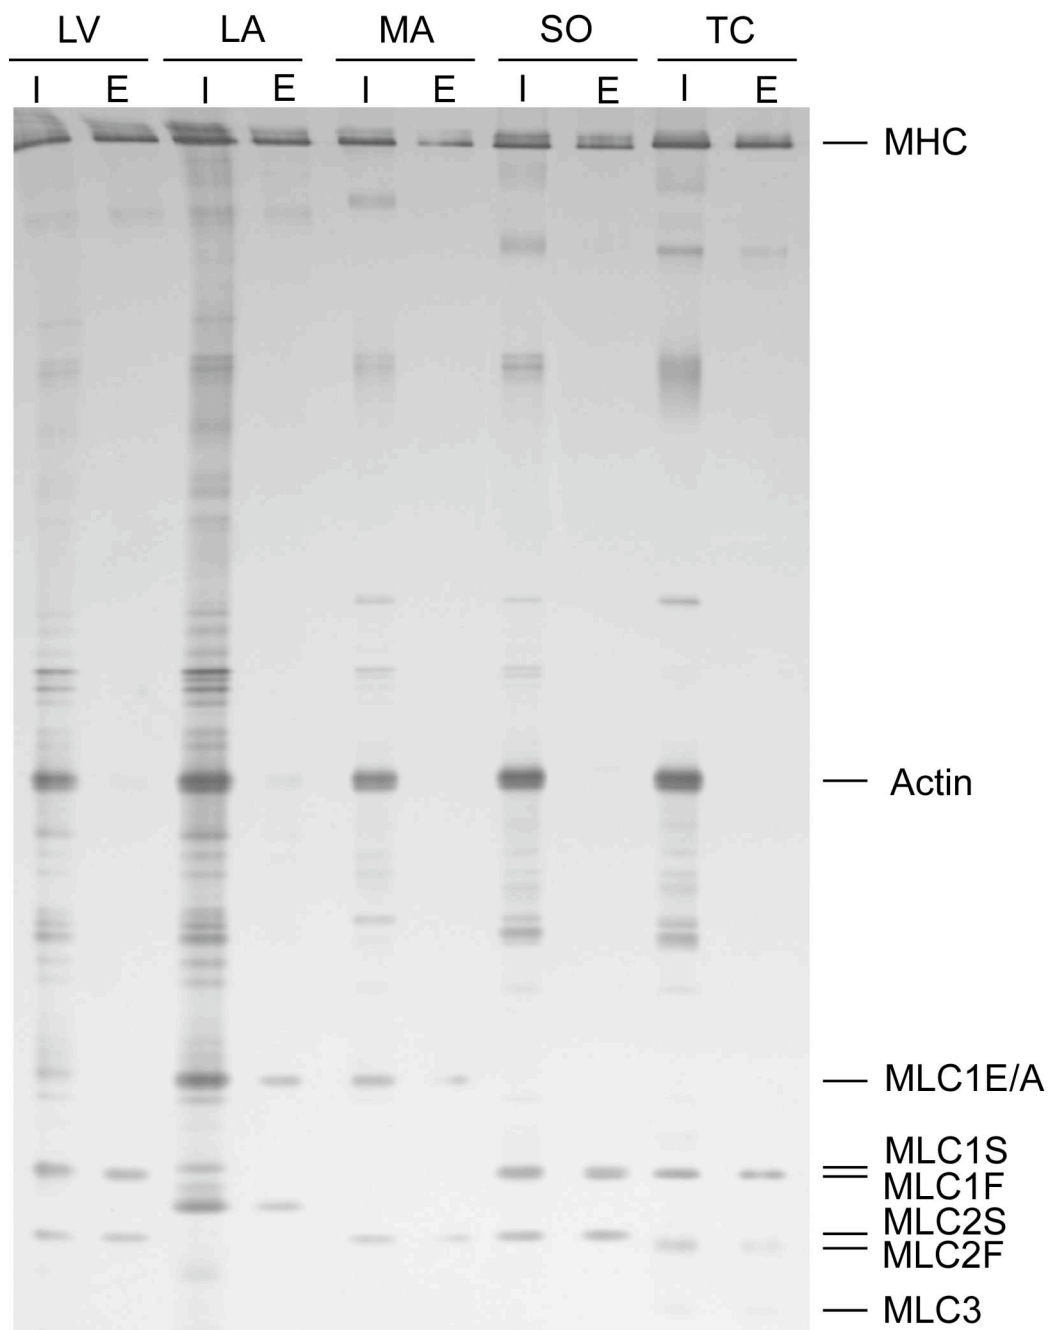

Supplement: jeb031369-figs4.pdf [file jeb031369-figs4.pdf]

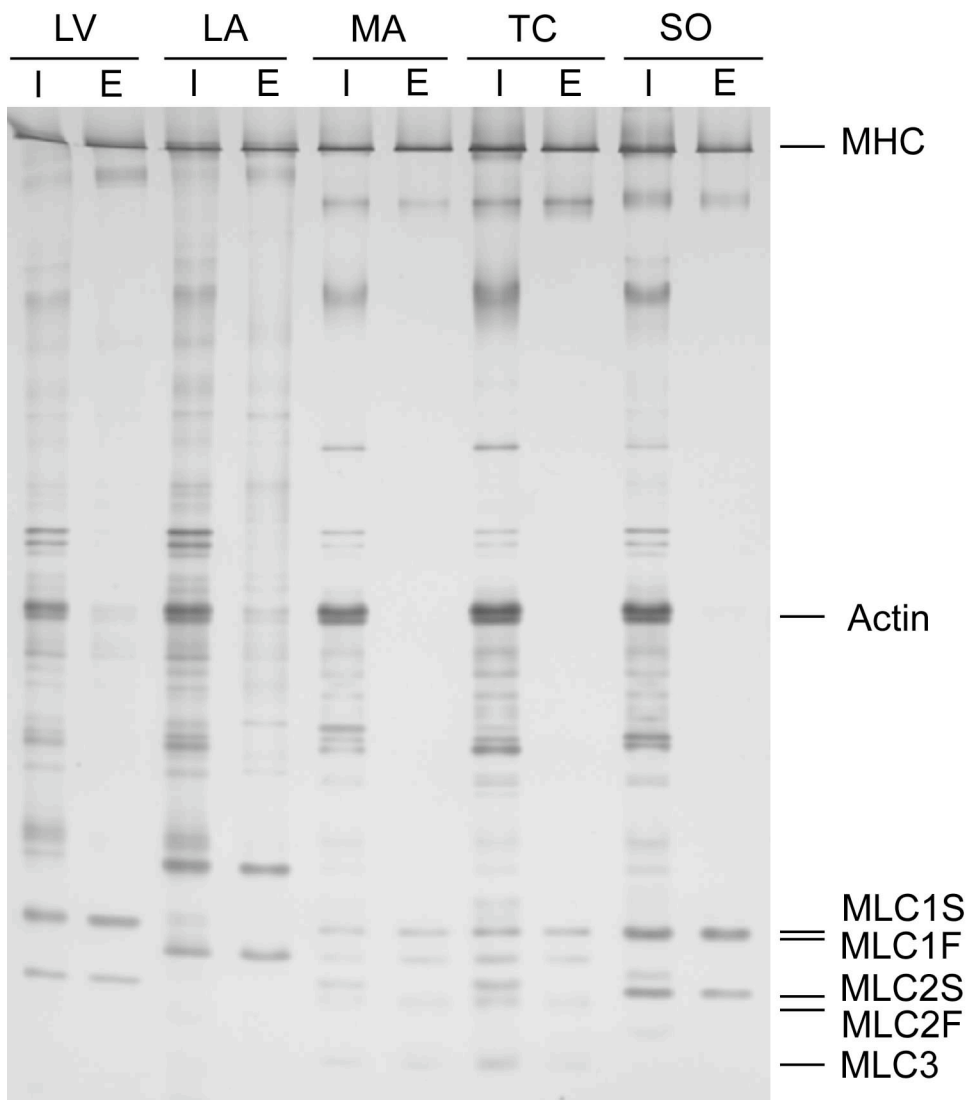

Supplement: jeb031369-figs6.pdf [file jeb031369-figs6.pdf]
